# Supplementary material
Source: PubMed Central journal article supplement (PMC7044066)

## Pre-treatment Clusters

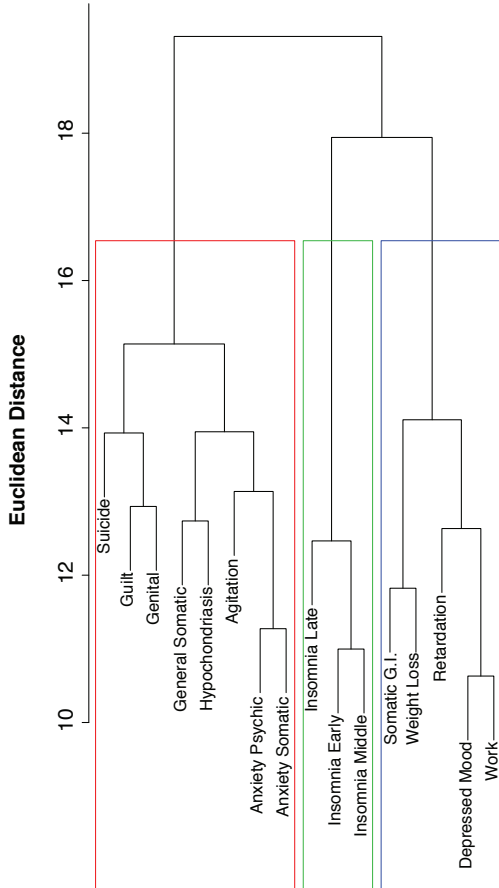

## Post-treatment Clusters

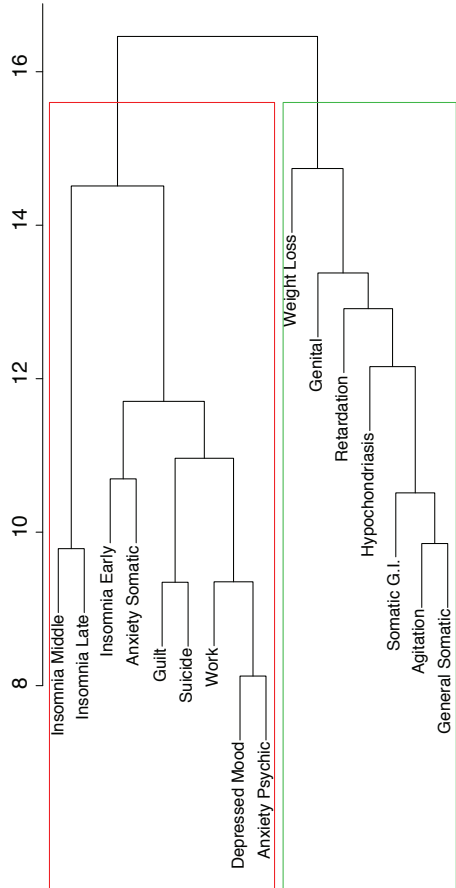

Supplement: NIHMS1534476-supplement-Supplementary_Figure_1.pdf [file NIHMS1534476-supplement-Supplementary_Figure_1.pdf]
